# Supplementary material
Source: publisher figshare collection journal article supplement (https://acs.figshare.com/ndownloader/files/3778402)
Supplement: Supplementary file 1 [file 3778402]

# **Paper-based RNA extraction, *in situ* isothermal amplification, and lateral flow detection for low-cost, rapid diagnosis of Influenza A (H1N1) from clinical specimens**

Natalia M. Rodriguez<sup>1</sup>, Jacqueline C. Linnes<sup>1</sup>, Andy Fan<sup>1</sup>, Courtney K. Ellenson<sup>1</sup>, Nira R. Pollock<sup>2</sup>,  
Catherine M. Klapperich<sup>1\*</sup>

<sup>1</sup>Department of Biomedical Engineering, Boston University, Boston, MA, USA; <sup>2</sup>Division of Infectious Diseases, Beth Israel Deaconess Medical Center, Harvard Medical School, Boston, MA, USA

- to whom correspondence should be addressed ([catherin@bu.edu](mailto:catherin@bu.edu))

## **SUPPORTING INFORMATION**

### **Table of contents:**

Table S1. Primer sequences.

Figure S1. Extraction and lateral flow detection setup images.

Figure S2. Extraction times and flow rates.

Figure S3. RT-LAMP product restriction enzyme digest.

Figure S4. Effects of glycogen on RT-LAMP reaction.

Figure S5. Negative clinical samples.

Table S1: Primer sequences

|         |                                    |                                                                                                                                                                                                                               |
|---------|------------------------------------|-------------------------------------------------------------------------------------------------------------------------------------------------------------------------------------------------------------------------------|
| RT-PCR  | Fwd<br>Rev<br>Probe                | 5' - gtgctataaacaccagcctycca<br>5' - cgggatattccttaatcctgtrgc<br>5'NED - cagaatatacatccRGtcacaattgga -MGB                                                                                                                     |
| RT-LAMP | F3<br>B3<br>FIP<br>BIP<br>LF<br>LB | 5' - gctaagagagcaattgagc<br>5' - atgtaggatttgctgagct<br>5' - cgagtcattgattggccatgacagtgtcatcattgaaagggtt<br>5' - aagggtaacggcagcatgtccgaatttcctttttaactagccat<br>5' FAM-acttgctctggggaatatctc<br>5' Biotin-atgctggagcaaaaagct |

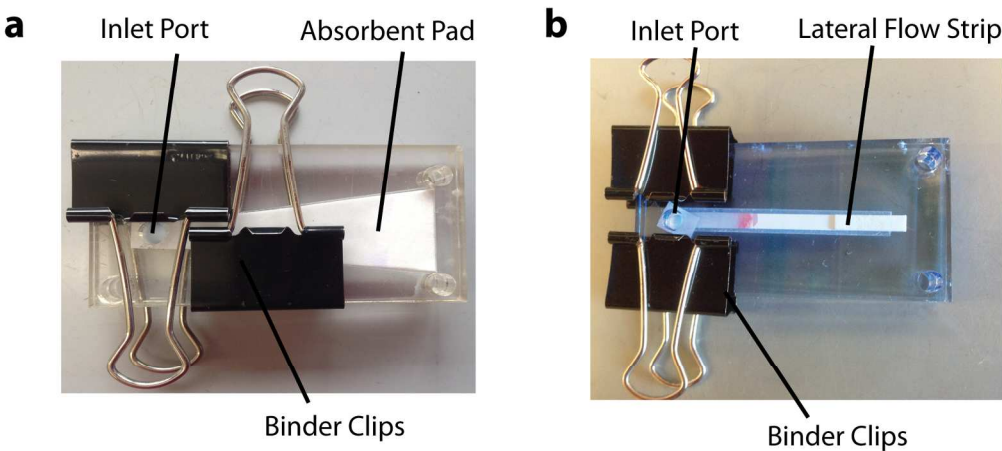

Figure S1: a) Extraction setup. b) LFD elution setup

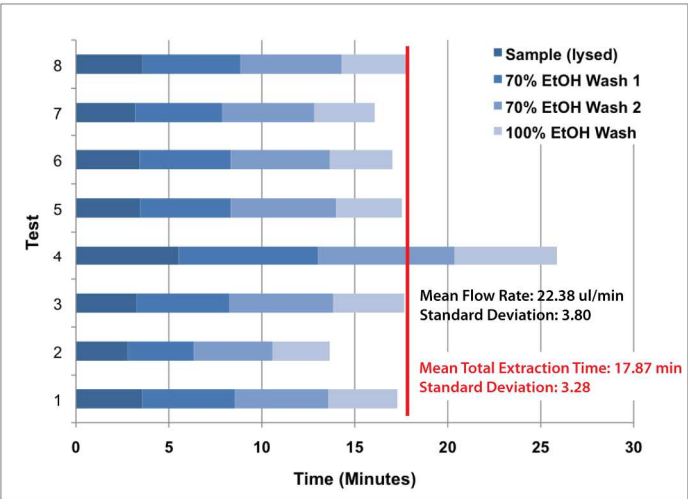

Figure S2: Flow rates and times for extraction. Mean flow rate = 22.38  $\mu$ l/min, SD = 3.8. Mean total extraction time = 17.87 min, SD = 3.28 (n=8).

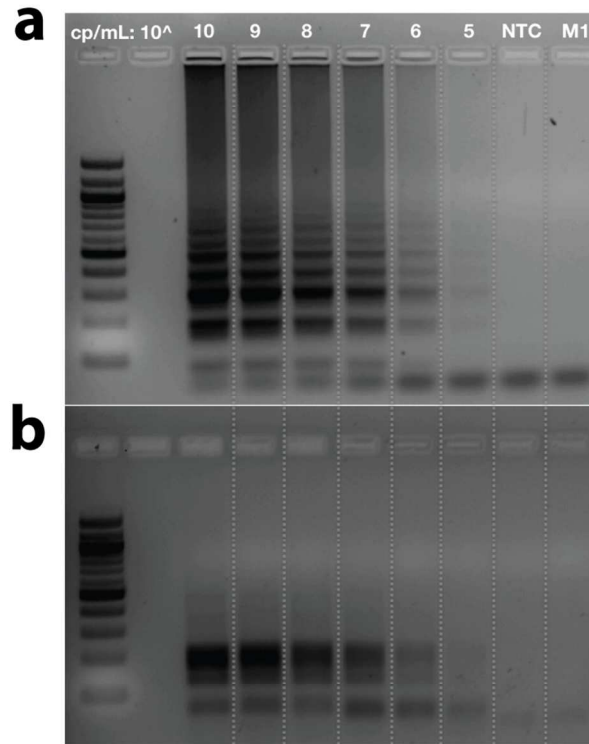

**Figure S3: RT-LAMP product restriction enzyme digest.** a) 2% Agarose gel electrophoresis of RT-LAMP products. First Lane = 100bp DNA ladder, 10 =  $10^{10}$  cp/mL, 9 =  $10^9$  cp/mL, etc. NTC = no template control. M1 = M1 gene in-vitro transcribed standards,  $10^{10}$  cp/mL. b) HindIII digestion of RT-LAMP products

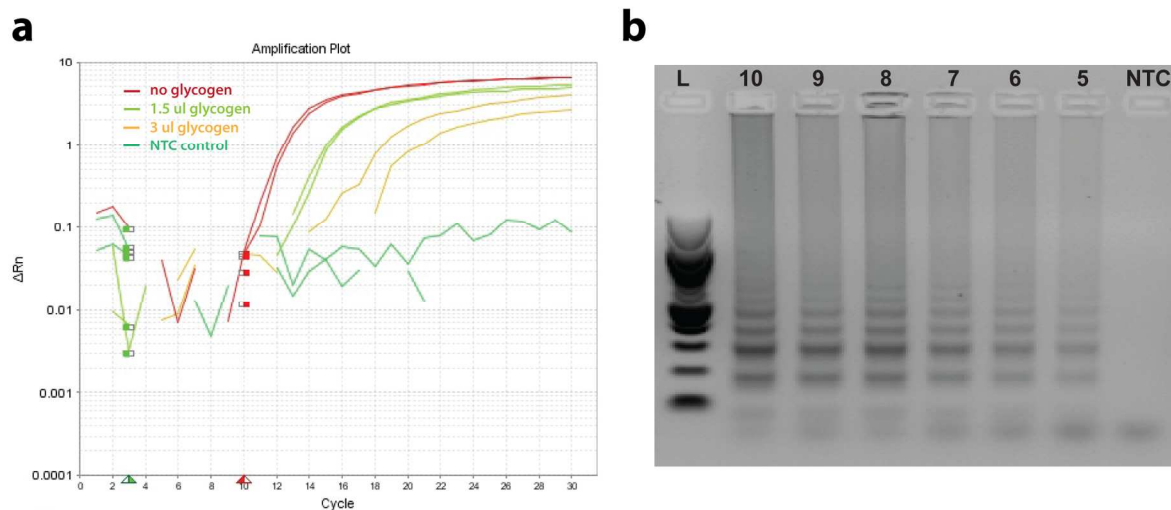

**Figure S4: Effects of glycogen on RT-LAMP reaction.** a) Real-time RT-LAMP amplification with increasing amounts of Glycoblue causing greater delays in amplification. b) Agarose gel electrophoresis of paper extracted RNA + RT-LAMP *in situ* products for 23 min at 65 °C. L = 100bp DNA ladder, 10 =  $10^{10}$  cp/mL, 9 =  $10^9$  cp/mL, etc. NTC = no template control.

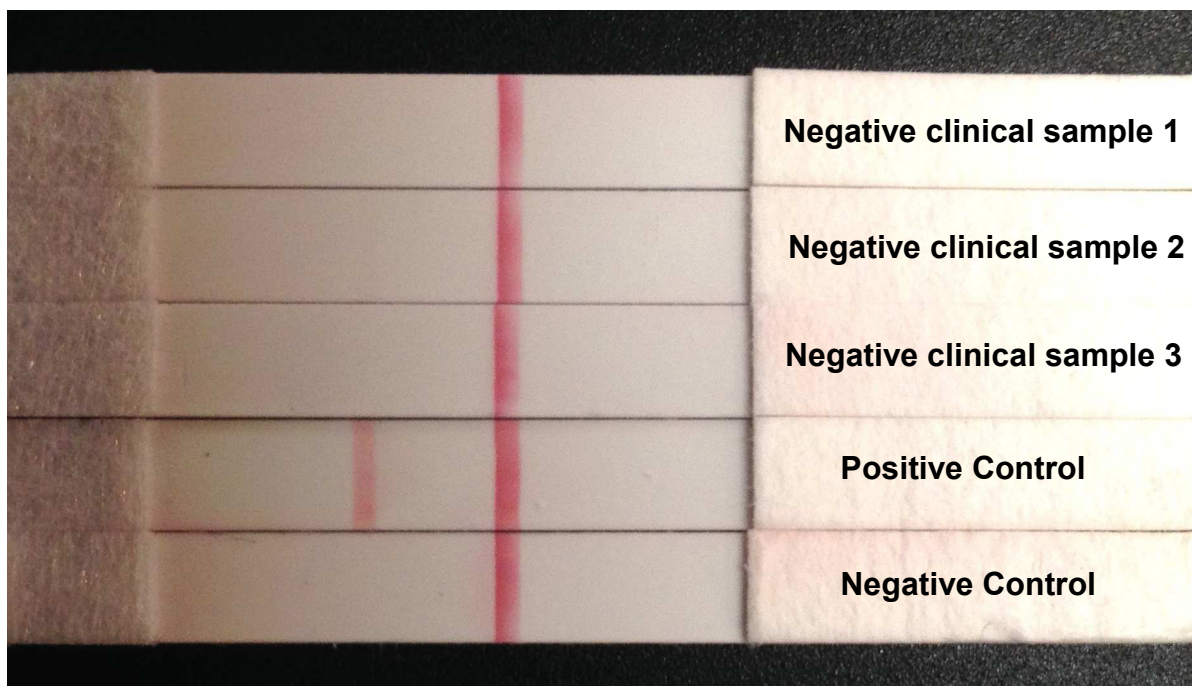

**Figure S5: Lateral flow detection strips from negative clinical samples that were PES-extracted and *in situ* RT-LAMP amplified. Three known H1N1-negative clinical samples from patients exhibiting symptoms of respiratory illness at the time of specimen collection were chosen at random. Prior laboratory testing indicated that sample 1 was Influenza B-positive, and samples 2 and 3 were Respiratory Syncytial Virus (RSV)-positive. None were detected by our assay, demonstrating our H1N1 strain-specificity.  $10^9$  cp/mL H1N1 RNA and no RNA samples were run alongside the samples as positive and negative controls.**
